# Supplementary material
Source: PubMed Central journal article supplement (PMC8258977)
Supplement: mmc1.pdf [file mmc1.pdf]

## Supplementary Online Content

1  
2  
3  
4  
5  
6  
7  
8  
9  
10  
11  
12  
13  
14  
15  
16  
17  
18  
19  
20  
21  
22  
23  
24  
25  
26  
27  
28  
29  
30

**Supplementary Table 1.** Search strategy details

**Supplementary Table 2.** Main characteristics of the studies included in the review

**Supplementary Table 3.** Newcastle-Ottawa Scale scoring of studies included in the review

**Supplementary Figure 1.** Funnel plot for meta-analysis for overall mortality in patients with or without lymphopenia

**Supplementary Figure 2.** Funnel plots for meta-analysis for mortality based on two different definitions of lymphopenia: A. Lymphocyte count  $< 1.0 \times 10^9/L$  B. Lymphocyte count  $< 1.5 \times 10^9/L$

**Supplementary Figure 3.** Funnel plot for meta-analysis for mortality based on lymphocyte count

**Supplementary Figure 4** Funnel plots for meta-analysis for lymphopenia and different post-operative complications

This supplementary material has been provided by the authors to give readers additional information about their work.

31 **Supplementary Table 1.** Search strategy details

32

| <b>Strategy</b>    | <b>Cohort studies</b>                                                                                                                                                                                                                                                                                           |
|--------------------|-----------------------------------------------------------------------------------------------------------------------------------------------------------------------------------------------------------------------------------------------------------------------------------------------------------------|
| Outcome            | Lymphopenia OR lymphocytopenia OR lymphocyte count OR leukocyte count                                                                                                                                                                                                                                           |
| Search filter      | None                                                                                                                                                                                                                                                                                                            |
| Databases searched | MEDLINE, EMBASE, WEB OF SCIENCE, GOOGLE SCHOLAR, and COCHRANE. Search terms were applied as MeSH and free text. To validate the search strategy a sampled cross-search strategy with the search terms “mortality” OR “death” AND “surgery” OR “preoperative” OR “perioperative” OR “postoperative” was applied. |

33

34 Abbreviations: MeSH, medical subject headings

35

36

37

38

39

40

41

42

43

44

45

46

47

48

49

50 **Supplementary Table 2. Main characteristics of the studies included in the review**

51

| First author               | Year | Surgery type | Sample size | Age*      | Gender             | Study type    | Comorbidities reported                                                                                                                                                                                                                       | Outcome(s) reported                                                                                                                  | Follow-up period             | Definition of lymphopenia                                    | Timing of lymphopenia         | Mortality | Q.A. |
|----------------------------|------|--------------|-------------|-----------|--------------------|---------------|----------------------------------------------------------------------------------------------------------------------------------------------------------------------------------------------------------------------------------------------|--------------------------------------------------------------------------------------------------------------------------------------|------------------------------|--------------------------------------------------------------|-------------------------------|-----------|------|
| Ackland <sup>21</sup>      | 2019 | Non-cardiac  | 1654        | 66 (±9)   | 841 (M)<br>813 (F) | Prospective   | NR                                                                                                                                                                                                                                           | Mortality, post-operative complications, wound morbidity, infection morbidity, lymphocyte levels, Length of hospital stay            | 30 days                      | < 1.00 x10 <sup>9</sup> /L                                   | Pre-operative: Day of surgery | 39/1654   | 2/5  |
| Pierre-Louis <sup>22</sup> | 2019 | Vascular     | 410         | 64 (±12)  | 327 (M)<br>83 (F)  | Retrospective | Coronary artery disease<br>200,<br>Stroke<br>68,<br>Diabetes mellitus<br>243,<br>Congestive heart failure<br>90,<br>Hyperlipidemia<br>209,<br>Chronic obstructive pulmonary disease 72,<br>Chronic renal disease<br>122,<br>Hypertension 361 | Mortality, Revision rate                                                                                                             | 30 days                      | N/A                                                          | Pre-operative: < 7 days       | 19/410    | 3/5  |
| Edwards <sup>10</sup>      | 2015 | Orthopaedic  | 745         | 70 (±11)* | 265 (M)<br>480 (F) | Prospective   | NR                                                                                                                                                                                                                                           | Mortality, post-operative complications, wound morbidity, infection morbidity, lymphocyte levels, Length of hospital stay            | 30 days                      | <1.3x10 <sup>9</sup> /L or <20% of the total leucocyte count | Pre-operative: Day of surgery | 1/745     | 2/5  |
| Lomivorotov <sup>23</sup>  | 2011 | Cardiac      | 1368        | 56 (±10)  | 870 (M)<br>498 (F) | Retrospective | Diabetes mellitus 4/40 lymphopenic group – 167/1328 non-lymphopenic group<br>Chronic renal disease<br>3/40 lymphopenic group – 93/1328 non-lymphopenic group                                                                                 | Mortality, morbidity, infectious complications, Inotropic support, Dialysis dependent ARF, Cardiac arrhythmia, Ventilation, Bleeding | In-hospital admission period | < 1.00 x10 <sup>9</sup> /L                                   | Pre-operative: < 72 hours     | 51/1368   | 3/5  |

| First author          | Year | Surgery type               | Sample size | Age*         | Gender            | Study type    | Comorbidities reported | Outcome(s) reported      | Follow-up period                                  | Definition of lymphopenia | Timing of lymphopenia        | Mortality                                                       | Q.A. |
|-----------------------|------|----------------------------|-------------|--------------|-------------------|---------------|------------------------|--------------------------|---------------------------------------------------|---------------------------|------------------------------|-----------------------------------------------------------------|------|
| O'Daly <sup>24</sup>  | 2010 | Orthopaedic                | 200         | 81<br>(±10)* | 83 (M)<br>294 (F) | Retrospective | NR                     | Mortality                | In-hospital admission period, 3 months, 12 months | < 1.5 x10 <sup>9</sup> /L | Pre-operative:<br>< 48 hours | In-hospital<br>14/200<br>3 months 30/200<br>12 months<br>59/200 | 3/5  |
| Masuo <sup>26</sup>   | 1998 | Abdominal                  | 45          | 83 (±4)      | NR                | Retrospective | NR                     | Mortality                | In-hospital admission period                      | N/A                       | Pre-operative:<br>Admission  | 6/45                                                            | 3/5  |
| Conlan <sup>20</sup>  | 1989 | Orthopaedic                | 126         | 79<br>(NR)   | 26(M)<br>100(F)   | Retrospective | NR                     | Mortality                | In-hospital admission period                      | N/A                       | Pre-operative:<br>Admission  | 62/126                                                          | 3/5  |
| Seltzer <sup>25</sup> | 1979 | Cardiac and<br>Non-cardiac | 263         | NR           | NR                | Retrospective | NR                     | Mortality, complications | In-hospital admission period                      | < 1.5 x10 <sup>9</sup> /L | Pre-operative:<br>Admission  | 2/263                                                           | 3/5  |

52  
53

\*Age reported as mean (standard deviation), asterisk denotes estimation from median and interquartile range.<sup>43</sup>

54  
55

Abbreviations: F, Female; M, Male; N/A, Not applicable; NOS, Newcastle-Ottawa Scale; NR, Not reported; Q.A. Quality appraisal of the methodology of the included studies

56

57

58

59

60

61

62 **Supplementary Table 3.** Newcastle-Ottawa Scale scoring of studies included in the review

63

| Source                                 | Study type                 | Selection | Comparability | Outcome or Exposure | Total Score |
|----------------------------------------|----------------------------|-----------|---------------|---------------------|-------------|
| Ackland et al. 2019 <sup>21</sup>      | Prospective cohort study   | ***       | **            | ***                 | 8           |
| Pierre-Louis et al. 2019 <sup>22</sup> | Retrospective cohort study | ***       | **            | ***                 | 8           |
| Edwards et al. 2015 <sup>10</sup>      | Prospective cohort study   | ***       | *             | ***                 | 7           |
| Aghdaii et al. 2014*                   | Prospective cohort study   | ***       | *             | *                   | 5           |
| Lomivorotov et al. 2011 <sup>23</sup>  | Retrospective cohort study | ****      | *             | ***                 | 8           |
| O'Daly et al. 2010 <sup>24</sup>       | Retrospective cohort study | ****      | **            | ***                 | 9           |
| Masuo et al. 1998 <sup>26</sup>        | Retrospective cohort study | ****      | *             | ***                 | 8           |
| Conlan 1989 <sup>20</sup>              | Retrospective cohort study | ***       | **            | **                  | 7           |
| Seltzer et al. 1979 <sup>25</sup>      | Retrospective cohort study | ****      | *             | **                  | 7           |

64  
65 For Selection, possible scores are 0 to 4 asterisks, 0 to 2 asterisks for Comparability, and 0 to 3 \* for Outcome or Exposure.

66 \*The study by Aghdaii et al. was excluded from our meta-analysis due to NOS < 7.

67

68 **Supplementary Figure 1.** Funnel plot for meta-analysis for overall mortality in patients with  
69 or without lymphopenia

70

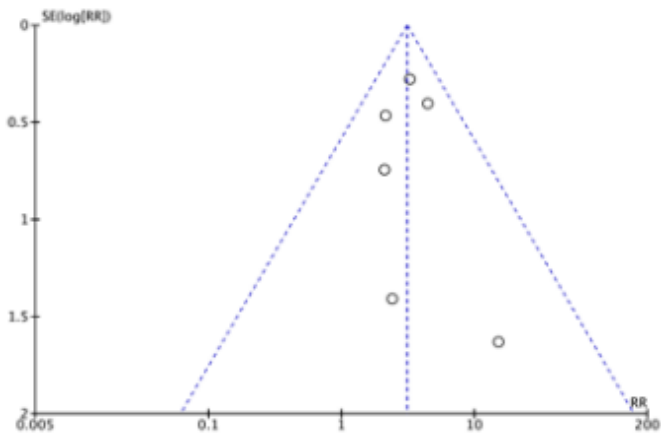

71

72 \*Funnel plot analysis showed symmetrical shape.

73 **Supplementary Figure 2.** Funnel plots for meta-analysis for mortality based on two different  
74 definitions of lymphopenia:

75

76 **A. Lymphocyte count < 1.0 x10<sup>9</sup>/L**  
77

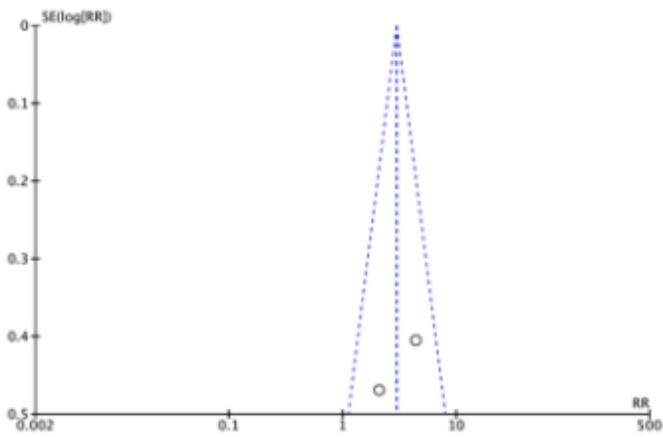

78

79 **B. Lymphocyte count < 1.5 x10<sup>9</sup>/L**  
80

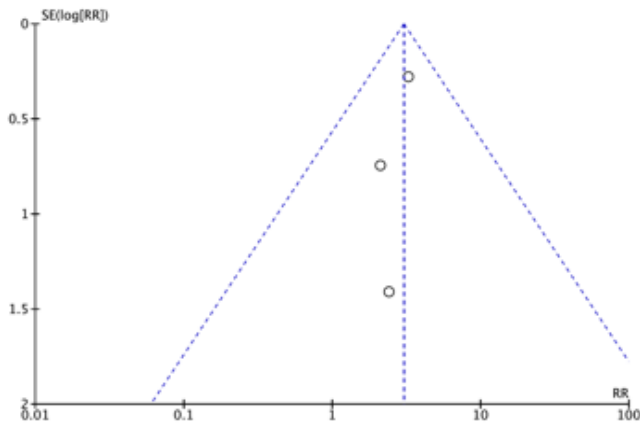

81

82

83 \*Funnel plots analysis showed symmetrical shape for both groups.

84

85

86

87

88

89

90

91

92

93

94

95

96

97 **Supplementary Figure 3.** Funnel plot for meta-analysis for mortality based on lymphocyte

98 count

99

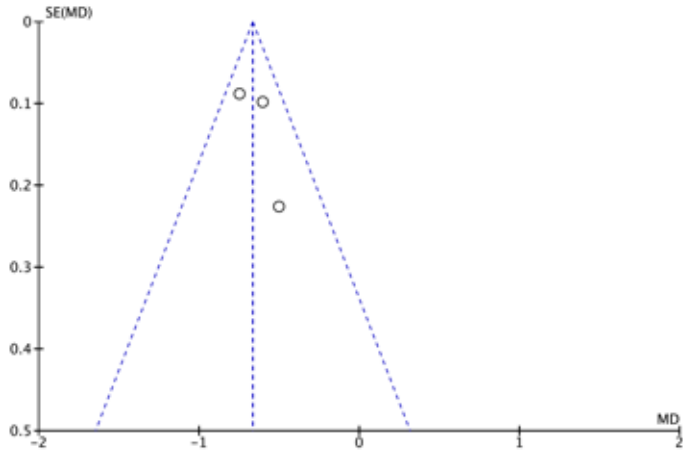

100

101 \*Funnel plot analysis showed symmetrical shape.

102

103

104

105

106

107

108

109

110

111

112

113

114

115

116

117

118

119

120

121

122

123

124

125

126

127

128

129

130

131



132 **Supplementary Figure 4.** Funnel plots for meta-analysis for lymphopenia and different post-  
133 operative complications

134 **All complications**

135

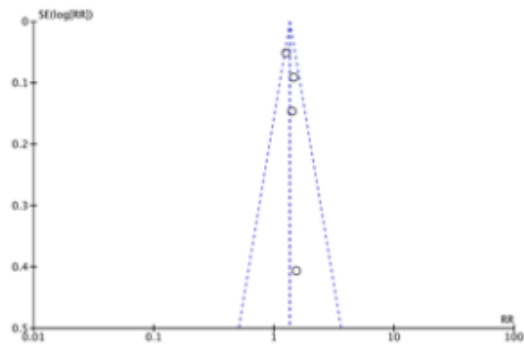

136

137

138 **Cardiovascular complications**

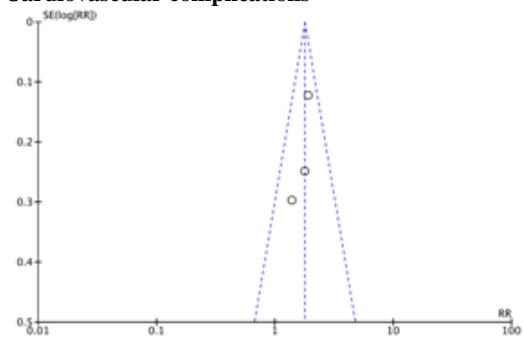

139

140

141 **Infectious complications**

142

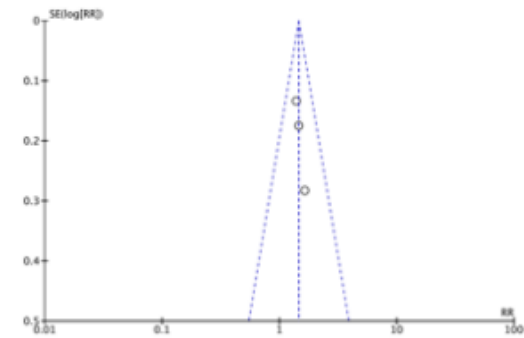

143

144

145 **Acute renal failure**

146

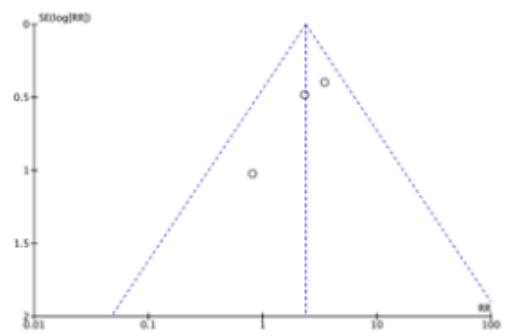

147

148 \* Funnel plots analysis showed symmetrical shape for all groups.
